# Supplementary material
Source: HighWire-hosted journal article supplement (https://bmjopenquality.bmj.com/highwire/filestream/136229/field_highwire_adjunct_files/1/ds5390.docx)

**Fig. 1: Putative Causal Factors**


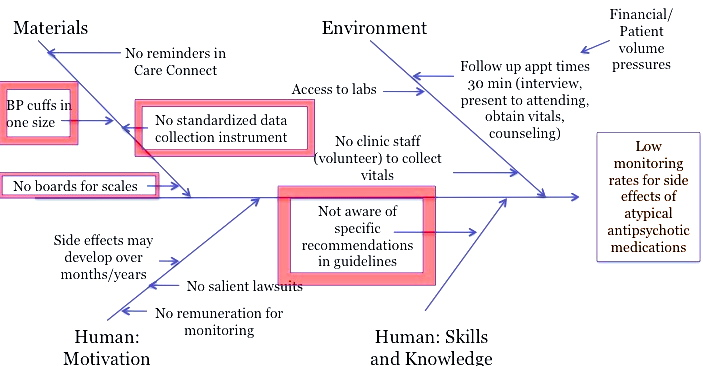

Supplement: ds5390.docx [file ds5390.docx]
